# Supplementary material for: Habitat Climate Change Vulnerability Index Applied to Major Vegetation Types of the Western Interior United States
Source: Preprints.org preprint supplement (doi:10.20944/preprints201905.0272.v1), 2019-05-22
Supplement: Supplementary file 1 [file supplementary]

## Sheet: Appendix2_summary
Climate Change Vulnerability		Potential/ Historical Extent (Km2)	Current Overall Vulnerability				Mid-21st Century Overall Vulnerability				Current Climate Exposure				Mid-21st Century Climate Exposure				Vulnerability from Overall Resilience				Vulnerability from Adaptive Capacity				Topo-climatic Variability Vulnerability				Vulnerability from Diversity within Functional Species Groups				Vulnerability from Keystone Species				Vulnerability from overall Sensitivity*				Vulnerability from Landscape Condition				Vulnerability from Invasive Plants
			Low	Moderate	High	Very High	Low	Moderate	High	Very High	Low	Moderate	High	Very High	Low	Moderate	High	Very High	Low	Moderate	High	Very High	Low	Moderate	High	Very High	Low	Moderate	High	Very High	Low	Moderate	High	Very High	Low	Moderate	High	Very High	Low	Moderate	High	Very High	Low	Moderate	High	Very High	Low	Moderate	High
			≥0.75	≥0.5 & <0.75	≥0.25 & <0.5	<0.25	≥0.75	≥0.5 & <0.75	≥0.25 & <0.5	<0.25	≥0.75	≥0.5 & <0.75	≥0.25 & <0.5	<0.25	≥0.75	≥0.5 & <0.75	≥0.25 & <0.5	<0.25	≥0.75	≥0.5 & <0.75	≥0.25 & <0.5	<0.25	≥0.75	≥0.5 & <0.75	≥0.25 & <0.5	<0.25	≥0.75	≥0.5 & <0.75	≥0.25 & <0.5	<0.25	≥0.75	≥0.5 & <0.75	≥0.25 & <0.5	<0.25	≥0.75	≥0.5 & <0.75	≥0.25 & <0.5	<0.25	≥0.75	≥0.5 & <0.75	≥0.25 & <0.5	<0.25	≥0.75	≥0.5 & <0.75	≥0.25 & <0.5	<0.25	≥0.75	≥0.5 & <0.75	≥0.25 & <0.5
Terrestrial Ecological System Types			(% area)	(% area)	(% area)	(% area)	(% area)	(% area)	(% area)	(% area)	(% area)	(% area)	(% area)	(% area)	(% area)	(% area)	(% area)	(% area)	(% area)	(% area)	(% area)	(% area)	(% area)	(% area)	(% area)	(% area)	(% area)	(% area)	(% area)	(% area)	(% area)	(% area)	(% area)	(% area)	(% area)	(% area)	(% area)	(% area)	(% area)	(% area)	(% area)	(% area)	(% area)	(% area)	(% area)	(% area)	(% area)	(% area)	(% area)
Cool Temperate Subalpine Woodlands
Northern Rocky Mountain Subalpine Woodland and Parkland	1	64645	0.054705	0.939746	0	0	0	0.593203	0.406727	0	0.567519	0.426932	0	0	0	0.0862155	0.803314	0.1104	0.000311547	0.998259	0.00142919	0	0	0.00577088	0.991718	0.00251094	0.259894	0.711586	0.0273978	0.00112243				1	0				0.966145	0.0338528	1.85629e-06	0	0.969714	0.0294184	0.000734161	0.000133188	0.998395	0.00160507	0
Rocky Mountain Lodgepole Pine Forest	7	16068	0.166302	0.830789	0.000495549	0	0	0.206467	0.79166	0.00187331	0.537628	0.462372	0	0	0	0.0266225	0.572699	0.400678	0.0186258	0.90898	0.0716848	0.000709495	0	0.345621	0.654379	0	0.00351018	0.34211	0.53412	0.12026		1			0				0.567711	0.407216	0.0198336	0.00282609	0.649489	0.273885	0.0672601	0.00936502	0	0	0
Aspen & Mountain Mahogany Forests and Woodlands
Inter-Mountain Basins Aspen-Mixed Conifer Forest and Woodland	2	27929	0.23181	0.76819	0	0	0	0.24049	0.75951	0	0.31935	0.606379	0.0742707	0	0	0.00195936	0.209568	0.788473	0.425344	0.57456	9.5706e-05	0	0.166559	0.833188	0.000253766	0	0.0365556	0.662039	0.300808	0.000597437	1				0				0.58852	0.410142	0.00133843	0	0.747052	0.226024	0.0250288	0.00189469	0	0	0
Rocky Mountain Aspen Forest and Woodland	3	24103	0.204502	0.795308	0.000165341	0	8.06542e-05	0.810279	0.18964	0	0.464363	0.535447	0.000189874	0	0	0.299673	0.632938	0.0673893	0.200059	0.794616	0.00531827	7.05742e-06	0.05765	0.932211	0.0101389	0	0.00629574	0.432854	0.539785	0.0210652	1				0				0.515946	0.478903	0.00491084	0.000215078	0.635392	0.308072	0.0461097	0.0104259	0	0	0
Inter-Mountain Basins Curl-leaf Mountain-mahogany Woodland and Shrubland	4	7241	0.528589	0.471411	0	0	0	0.32029	0.67971	0	0.801295	0.187336	0.0113691	0	0.000111857	0.0368244	0.677289	0.285774	0.0975191	0.863988	0.0384933	0	0	0.676167	0.323833	0	0.0432204	0.632947	0.301557	0.0222752		1			0				0.737377	0.241176	0.0214475	0	0.780377	0.170986	0.0389956	0.00964207	0.906067	0.0457461	0.044622
Montane Conifer Forests and Woodlands
Northern Rocky Mountain Dry-Mesic Montane Mixed Conifer Forest	5	129039	0.0530719	0.945666	0.000374841	0	0	0.936767	0.0566491	0	0.601611	0.39767	0.000719145	0	0	0.737842	0.252066	0.00350825	0.00590656	0.865881	0.128185	2.75221e-05	0	0.160537	0.839463	0	0.000350537	0.160187	0.750692	0.0887711		1			0				0.40751	0.557284	0.033989	0.000329894	0.464933	0.33787	0.151007	0.0461901	0	0	0
Middle Rocky Mountain Montane Douglas-fir Forest and Woodland	6	25585	0.138143	0.861857	0	0	0	0.366553	0.633447	0	0.821384	0.178616	0	0	0	0.024848	0.946861	0.028291	0.00102419	0.99741	0.00156588	0	0	0.616525	0.383475	0	0.00705659	0.609469	0.379194	0.00428005		1			0				0.361367	0.638633	0	0	0.49458	0.45895	0.044575	0.00189482	0	0	0
Southern Rocky Mountain Dry-Mesic Montane Mixed Conifer Forest and Woodland	8	15430	0.00775989	0.99224	0	0	0	0.0319136	0.968086	0	0.623751	0.375645	0.000603699	0	0	0.00843446	0.0828338	0.908732	7.61185e-05	0.977736	0.0221883	0	0	0.79925	0.20075	0	0.0359615	0.763289	0.198363	0.00238645		1			0				0.142645	0.827518	0.0298369	0	0.730641	0.21433	0.0469667	0.00806174	0	0	0
Southern Rocky Mountain Mesic Montane Mixed Conifer Forest and Woodland	9	8961	0.0253002	0.9747	0	0	0	0.0532098	0.94679	0	0.546933	0.453067	0	0	0	0.00393635	0.419391	0.576672	0.0039011	0.988477	0.00762232	0	0	0.890183	0.109817	0	0.075699	0.814484	0.109729	8.85791e-05		1			0				0.278772	0.717874	0.00335425	0	0.770026	0.194606	0.0315558	0.00381252	0	0	0
Ponderosa Pine Woodlands and Savannas
Northern Rocky Mountain Ponderosa Pine Woodland and Savanna	10	49197	0.111629	0.785627	0	0	1.79463e-05	0.630682	0.220856	0.000690192	0.902064	0.00019741	0	0	0.0327543	0.562488	0.257004	0	5.43125e-06	0.706189	0.288478	0.0053284	0	0.0880198	0.91198	0	3.45755e-06	0.0880163	0.626887	0.285093		1			0				0.0932209	0.808677	0.0566033	0.0115601	0.164571	0.566367	0.178035	0.0910275	0	0	0
Southern Rocky Mountain Ponderosa Pine Woodland	11	38713	0	0.978062	0.021927	0	0	0.62372	0.37628	0	0.593124	0.406665	0.000211104	0	0.000128799	0.0305611	0.924521	0.0447893	0.000160272	0.966479	0.0333608	0	0	0.118496	0.881504	0	0.00103987	0.117456	0.816661	0.0648436		1			0				0.387394	0.612384	0.000211322	0	0.54938	0.362765	0.0661672	0.0216881	0.99389	0.00325854	0.0028518
Northwestern Great Plains-Black Hills Ponderosa Pine Woodland and Savanna	12	18193	0	0.92737	0.0726101	0	0.0032782	0.996399	0.000322653	0	0.902064	0.00019741	0	0	0.0327543	0.562488	0.257004	0	0	0.806061	0.193939	0	0	0.00911893	0.990881	0	1.75893e-05	0.00910134	0.736559	0.254322		1			0				0.389203	0.575717	0.0350592	0	0.526428	0.372023	0.049074	0.0524753	0	0	0
California Montane Jeffrey Pine-(Ponderosa Pine) Woodland	13	13264	0.0160007	0.983854	0.000145344	0	0	0.00884524	0.988021	0.00313406	0.989789	0.0102107	0	0	0	0.00661134	0.353129	0.64026	0	0.299093	0.700907	0	0	0.000480003	0.580767	0.418753	0.00713409	0.14872	0.674087	0.170059				1	0				0.22207	0.737566	0.0403636	0	0.340725	0.531089	0.116819	0.0113668	0	0	0
Southern Rocky Mountain Ponderosa Pine Savanna	14	12892	0.00853213	0.991468	0	0	0	0.10405	0.89595	0	0.593124	0.406665	0.000211104	0	0.000128799	0.0305611	0.924521	0.0447893	2.38749e-05	0.975298	0.0246785	0	0	0.0125764	0.987424	0	4.83781e-05	0.012528	0.728548	0.258875		1			0				0.576143	0.423857	0	0	0.618043	0.33459	0.0370972	0.01027	0.998688	0.00105866	0.0002532
East Cascades Oak-Ponderosa Pine Forest and Woodland	15	470	0	1	0	0	0	0.0293748	0.970625	0	0.250556	0.749444	0	0	0.0021708	0.0346467	0.963182	0	0	0.294644	0.705356	0	0	0	1	0	0	0	0.326827	0.673173		1			0				0.113502	0.855297	0.031201	0	0.00342849	0.145444	0.27092	0.580208	0.921748	0.0671054	0.0111469
Pinyon and Juniper Woodlands
Madrean Pinyon-Juniper Woodland	16	44866	0.00036008	0.971616	0.0280236	0	0.000297875	0.850333	0.0673847	0	3.81262e-05	0.960654	0.0393078	0	0.0103654	0.731764	0.257871	0	0.0264765	0.907543	0.065259	0.000721944	0	0.293735	0.706265	0	0.000199549	0.211551	0.593429	0.112836		1			0				0.764033	0.182806	0.0457159	0.00744486	0.767259	0.178595	0.0463957	0.0077512	0.733001	0.0726174	0.0708834
Colorado Plateau Pinyon-Juniper Woodland	17	39898	0.000728633	0.999271	0	0	0	0.581989	0.418011	0	0.504006	0.495292	0.000702038	0	0	0.363867	0.636133	0	0	0.792045	0.207955	0	0	0.000764364	0.919776	0.0794598	0.00565041	0.241332	0.750599	0.00241775				1	0				0.60226	0.394516	0.00322414	0	0.571605	0.377955	0.0479781	0.0024616	0.937464	0.0320686	0.0303506
Great Basin Pinyon-Juniper Woodland	18	22304	0.0012972	0.996493	0.00221017	0	0	0.69996	0.30004	0	0.680112	0.319888	0	0	0	0.479795	0.518871	0.00133387	0	0.898779	0.101161	5.99209e-05	0	0	0.99502	0.00497961	0.0105265	0.75366	0.234961	0.000853418				1	0				0.8092	0.162275	0.0284646	5.99209e-05	0.895487	0.0891808	0.0138966	0.00143592	0.878015	0.0489931	0.0575974
Southern Rocky Mountain Pinyon-Juniper Woodland	19	10466	0.00206954	0.99793	0	0	0	0.447837	0.552163	0	0.872983	0.127017	0	0	0	0.284028	0.60829	0.107683	0	0.926308	0.0736923	0	0	0	0.595527	0.404473	0	0.0701662	0.905969	0.0238647				1	0				0.889045	0.110955	0	0	0.728989	0.193694	0.0708504	0.00646634	1	0	0
Southern Rocky Mountain Juniper Woodland and Savanna	20	10382	0	1	0	0	0	0.37834	0.62166	0	0.439724	0.560276	0	0	0	0.3079	0.436773	0.255327	0	0.86355	0.13645	0	0	0.000254337	0.999746	0	0	0.000254337	0.396141	0.603604		1			0				0.1554	0.835327	0.00927239	0	0.681629	0.25119	0.0551951	0.0119858	1	0	0
Columbia Plateau Western Juniper Woodland and Savanna	21	7784	0.0259841	0.947758	0.0262578	0	0	0.277396	0.722604	0	0.69951	0.30049	0	0	0.0010854	0.242118	0.756796	0	0	0.348537	0.651463	0	0	0.00410225	0.995898	0	0	0.00410225	0.45788	0.538018		1			0				0.158687	0.432181	0.408918	0.000213334	0.41576	0.380612	0.147496	0.0561328	0.278436	0.183564	0.456086
Inter-Mountain Basins Juniper Savanna	22	1531	0	0.994985	0.00501486	0	0	0.0102572	0.989743	0	0.307838	0.689068	0.00309462	0	0	0.0013172	0.158402	0.840281	0	0.957014	0.0429861	0	0	0.00585068	0.994149	0	0	0.00585068	0.592897	0.401253		1			0				0.396285	0.601794	0.00192025	0	0.758408	0.19713	0.0414996	0.00296237	0.99133	0.00622626	0.00244395
Rocky Mountain Foothill Limber Pine-Juniper Woodland	23	1330	0.0502329	0.848114	0.101653	0	0	0.161075	0.838925	0	0.361745	0.481454	0.156801	0	0	0.0108516	0.665816	0.323332	0.01509	0.958408	0.0265018	0	0	0.312883	0.687117	0	0.0165637	0.296319	0.670694	0.0164236				1	0				0.558359	0.437262	0.00437841	0	0.55945	0.356332	0.0643486	0.0198703	0.959468	0.028755	0.0117772
Colorado Plateau Pinyon-Juniper Shrubland	24	206	0	0.954872	0.0451276	0	0	0.377531	0.622469	0	0.330044	0.669956	0	0	0	0.576634	0.355871	0.0674948	0	0.089351	0.910649	0	0	0	0.292504	0.707496	0	0.0347498	0.690082	0.275168				1	0				0.123668	0.818782	0.0575494	0	0.195762	0.627776	0.120327	0.0561343	0.902001	0.0555839	0.0244113
Cool Temperate Grasslands
Northwestern Great Plains Mixedgrass Prairie	25	620860	0	0.681508	0.318491	0	0.0264796	0.738222	0.235298	0	0.000485584	0.825361	0.174153	0	0.271462	0.689973	0.0385652	0	8.00663e-05	0.57925	0.42067	0	0	0.321594	0.678406	0	0	5.47627e-06	0.0149525	0.985042		1			1				0.0685155	0.524022	0.190707	0.216756	0.0700978	0.152239	0.241129	0.536534	0.779276	0.096955	0.121677
Western Great Plains Sand Prairie	26	107307	3.40435e-05	0.904714	0.0952515	0	0	0.0161703	0.98383	0	0.741651	0.256264	0.0020848	0	0.0260363	0.795905	0.175356	0.00270277	0	0.104672	0.895216	0.000111943	0	0	1	0	0	0	0.00161099	0.998389		1			0				0.0407151	0.855029	0.104131	0.000125153	0.289894	0.143038	0.188236	0.378832	0.606965	0.126404	0.265261
Columbia Plateau Steppe and Grassland	27	23913	0.000921677	0.998715	0.000363793	0	0	0.479495	0.520505	0	0.945347	0.0546527	0	0	0	0.803779	0.196221	0	0.000102634	0.275476	0.723822	0.000599548	0	0.00641279	0.993587	0	0	0.00641279	0.29904	0.694547		1			0				0.0687861	0.413156	0.508475	0.0095826	0.0765914	0.196002	0.314265	0.413141	0.608006	0.164917	0.166969
Inter-Mountain Basins Semi-Desert Grassland	28	22532	0.000312755	0.99869	0.000671884	0	0	0.112708	0.886967	0	0.884694	0.114981	0	0	0	0.100758	0.85683	0.0420871	0	0.667765	0.325613	0.00662213	0	0.0005058	0.999494	0	0	0.000180823	0.0815812	0.917913		1			0				0.396814	0.49121	0.0981475	0.0135031	0.424663	0.371461	0.105503	0.0983722	0.917538	0.0324974	0.0259885
Northern Rocky Mountain Lower Montane-Foothill-Valley Grassland	29	19327	0.0123282	0.973513	0.0141584	0	0	0.673414	0.326586	0	0.81648	0.183514	5.86739e-06	0	0.00829859	0.578896	0.412805	0	0.000443826	0.662783	0.327217	0.00955672	0	0.0332249	0.966775	0	0.000227571	0.0329974	0.4995	0.467275		1			0				0.266573	0.644302	0.0684134	0.0207123	0.10048	0.231923	0.460612	0.206985	0.987891	0.00726886	0.0036382
Southern Rocky Mountain Montane-Subalpine Grassland	30	3054	0.00405476	0.994102	0.00184307	0	0	0.0347744	0.965226	0	0.349998	0.618649	0.0313534	0	0	0.0102469	0.285276	0.704477	0.00554778	0.924209	0.0702436	0	0	0.188709	0.811291	0	0.0118673	0.176842	0.617726	0.193565		1			0				0.443578	0.552189	0.00423243	0	0.518272	0.369139	0.0995338	0.0130553	0.99721	0.00198362	0.000806178
Cool Semi-desert & Temperate Shrubland and Steppe
Inter-Mountain Basins Big Sagebrush Shrubland	31	282439	0.0214882	0.97467	0.00312673	0	5.39447e-05	0.731512	0.268428	0	0.928686	0.0700135	0.000585792	0	0.0850407	0.760116	0.154837	0	6.18314e-05	0.486087	0.512697	0.00115426	0	0.00777194	0.992228	0	4.69471e-05	0.00772499	0.309368	0.68286		1			0				0.238487	0.462632	0.286385	0.0124956	0.349757	0.352982	0.173774	0.123487	0.612073	0.127584	0.151423
Inter-Mountain Basins Big Sagebrush Steppe	32	182114	0.0191091	0.973637	0.00148142	0	0	0.353268	0.646732	0	0.946148	0.0480797	0	0	0.0151439	0.347438	0.632399	0.00501953	5.10159e-05	0.40297	0.595606	0.00137374	0	0.00499266	0.995007	0	9.1624e-06	0.0049835	0.253879	0.741128		1			0				0.175793	0.567513	0.246689	0.0100052	0.328819	0.347132	0.176896	0.147153	0.507595	0.190271	0.253139
Inter-Mountain Basins Montane Sagebrush Steppe	33	83707	0.0766122	0.923289	9.86043e-05	0	0	0.702653	0.297347	0	0.741409	0.25847	0.000120667	0	0	0.26759	0.731173	0.00123667	0.00723556	0.878948	0.113817	0	0	0.153573	0.846427	0	0.00331026	0.150262	0.710062	0.136365		1			0				0.57586	0.386402	0.0377381	0	0.52345	0.322172	0.110175	0.0442037	0.881458	0.0580055	0.0531075
Great Basin Xeric Mixed Sagebrush Shrubland	34	62126	0.0674806	0.931602	3.45505e-05	0	0	0.0810645	0.918052	0	0.853042	0.146074	0	0	0	0.0254229	0.960696	0.0129979	9.81757e-05	0.770425	0.229338	0.000139115	0	0.0472358	0.952764	0	0.000862851	0.0463729	0.773854	0.17891		1			0				0.324978	0.574168	0.100034	0.000819956	0.652777	0.309625	0.0303575	0.00724036	0.69778	0.113109	0.132074
Mojave Mid-Elevation Mixed Desert Scrub	35	54768	0.00736245	0.989349	0.00328819	0	0	0.192262	0.807738	0	0.60518	0.394787	3.23894e-05	0	0	0.0886008	0.685237	0.226162	0.000727948	0.762266	0.237006	0	0	0.0253556	0.974644	0	5.02849e-05	0.0253053	0.563737	0.410907		1			0				0.543804	0.390551	0.0656449	0	0.719983	0.183715	0.0607388	0.035563	0.524703	0.146978	0.327892
Columbia Plateau Low Sagebrush Steppe	36	21361	0.0246588	0.974627	0.000714038	0	0	0.477156	0.522844	0	0.555388	0.444612	0	0	0.00488299	0.316403	0.678714	0	0.00058473	0.793845	0.205498	7.28069e-05	0	0.0167896	0.98321	0	0	0.0167896	0.402729	0.580482				1	0				0.498762	0.409787	0.0847999	0.00665083	0.609809	0.244646	0.0752804	0.0702651	0.525239	0.226319	0.221993
Rocky Mountain Gambel Oak-Mixed Montane Shrubland	37	19637	0.000312665	0.999618	6.97103e-05	0	0	0.0322796	0.963052	0.00466853	0.243458	0.755889	0.000652967	0	0	0.00710138	0.205746	0.787152	0.000155095	0.876154	0.123691	0	0	0.234436	0.765564	0	0.00181371	0.232622	0.675366	0.0901981		1			0				0.475213	0.500588	0.0241994	0	0.395384	0.388497	0.117337	0.098782	0.995006	0.00400071	0.000993681
Northwestern Great Plains Shrubland	39	9786	0	0.701607	0.298393	0	0	0.362232	0.632975	0.00479352	0.0869125	0.712913	0.200174	0	0	0.246411	0.752856	0.00073339	0	0.580519	0.259281	0.1602	0	9.93305e-05	0.999901	0	0	9.93305e-05	0.259257	0.740644		1			0				0.361239	0.410793	0.0528687	0.175099	0.251826	0.282158	0.227924	0.238092	0.858326	0.0755673	0.0661069
Colorado Plateau Blackbrush-Mormon-tea Shrubland	40	8366	0	1	0	0	0	0.133669	0.866331	0	0.882979	0.117021	0	0	0	0.0738588	0.772259	0.153882	0	0.805131	0.194869	0	0	0.00292778	0.997072	0	0	0.00292778	0.284601	0.712471				1	0				0.248481	0.719244	0.0322744	0	0.249008	0.588905	0.147522	0.0145653	0.929685	0.0468668	0.0234484
Rocky Mountain Lower Montane-Foothill Shrubland	41	8020	0.000625191	0.995688	0.00368651	0	0	0.0381973	0.961787	1.616e-05	0.255375	0.744625	0	0	0	0.0130785	0.269665	0.717256	6.46401e-05	0.847535	0.152189	0.00021109	0	0.100868	0.899132	0	0.00211696	0.0987509	0.705597	0.193536		1			0				0.432831	0.523301	0.0436563	0.00021109	0.355606	0.426218	0.140482	0.0776944	0.955056	0.0259035	0.0188961
Colorado Plateau Mixed Low Sagebrush Shrubland	42	4250	0.000127688	0.996021	0.00385161	0	0	0.0595255	0.940474	0	0.155648	0.778755	0.0655974	0	0	0.0177277	0.42034	0.561933	0	0.829475	0.170525	0	0	0.031417	0.968583	0	0.0011511	0.0302659	0.536822	0.431761		1			0				0.494487	0.48203	0.0234832	0	0.301735	0.325485	0.31089	0.0618906	0.976109	0.0162431	0.00664359
Columbia Plateau Scabland Shrubland	43	3775	0	0.845441	0.154559	0	0	0.0455323	0.954468	0	0.463125	0.536875	0	0	0	0.202859	0.797141	0	0	0.0102287	0.919703	0.0700686	0	0	0.0147776	0.985222	0	0	0.162191	0.837809				1	0				0.0219014	0.570932	0.404879	0.00228734	0.0922941	0.26901	0.310885	0.327811	0.428452	0.21857	0.275005
Wyoming Basins Dwarf Sagebrush Shrubland and Steppe	44	1107	0	0.961989	0.0380112	0	0	0.0535316	0.946468	0	0.272683	0.698493	0.0288247	0	0	0.00810398	0.530554	0.461342	0	0.797752	0.202248	0	0	0.0147086	0.5734	0.411891	0	0.0147086	0.5734	0.411891		1			0				0.473373	0.320992	0.190275	0.0153595	0.473373	0.320992	0.190275	0.0153595	0.986374	0.012134	0.00149207
Mixed Salt Desert Scrub & Greasewood
Inter-Mountain Basins Mixed Salt Desert Scrub	45	95681	0.0212812	0.96364	0.0150788	0	0	0.574651	0.425349	0	0.829525	0.160924	0.0095512	0	0.00599478	0.618159	0.375846	0	9.4392e-05	0.53723	0.462636	3.93653e-05	0	0.00244225	0.997558	0	0.000105143	0.00233711	0.11319	0.884368		1			0				0.31613	0.523564	0.155564	0.00474212	0.401454	0.389472	0.157995	0.0510788	0.757428	0.117297	0.0850066
Inter-Mountain Basins Greasewood Flat	46	58269	4.87926e-05	0.97715	0.0228014	0	0	0.86336	0.13664	0	0.947207	0.0527932	0	0	0.497076	0.499242	0.00368196	0	0	0.163818	0.794777	0.0414053	0	0	0.00590251	0.994097	0	0.00058148	0.0333292	0.966089				1	0				0.331122	0.479499	0.185559	0.00381903	0.338474	0.344195	0.19537	0.121961	0.751052	0.121675	0.107637
Inter-Mountain Basins Mat Saltbush Shrubland	47	10677	0	0.985883	0.0141171	0	0	0.499806	0.500194	0	0.742203	0.257797	0	0	0.000225309	0.861544	0.138231	0	0	0.183116	0.815563	0.00132151	0	0	0.00468446	0.995316	0	0	0.0799158	0.920084				1	0				0.484533	0.490177	0.0252893	0	0.388511	0.290816	0.20043	0.120242	0.74032	0.154205	0.102757
Warm Temperate Grasslands & Semi-Desert Grasslands
Western Great Plains Shortgrass Prairie	48	258868	0.133813	0.865724	0.000463343	0	0	0.841314	0.158686	0	0.741651	0.256264	0.0020848	0	0.0260363	0.795905	0.175356	0.00270277	0.000681185	0.892327	0.106992	0	0	0.367491	0.632509	0	0	1.99005e-05	0.00351747	0.996463		1			1				0.197072	0.732643	0.0702846	0	0.145976	0.205087	0.185686	0.463251	0.93939	0.0279741	0.029221
Apacherian-Chihuahuan Semi-Desert Grassland and Steppe	49	249336	0	0.836871	0.163129	0	1.39973e-05	0.589442	0.410544	0	1.96122e-05	0.767005	0.232976	0	0.00134895	0.369294	0.629357	0	0.00121897	0.773005	0.225719	5.71121e-05	0	0.014672	0.985328	0	8.46254e-06	0.0146635	0.342669	0.642659		1			0				0.550107	0.419971	0.0293878	0.000534062	0.661217	0.28208	0.0485024	0.00820068	0.86664	0.0868743	0.0410399
Warm Desert Shrublands
Sonoran Paloverde-Mixed Cacti Desert Scrub	50	131505	0	0.628533	0.37129	0.000164503	0	0.578878	0.421109	0	0	0.0523861	0.939339	0.0082612	0	0.173267	0.826168	0.000551792	3.65984e-05	0.855758	0.134302	0.0099038	0	0.000230091	0.99977	0	0	0.000230091	0.0897014	0.910068		1			0				0.783369	0.187739	0.0180796	0.0108128	0.671712	0.190072	0.0731892	0.0650277	0.940213	0.0424778	0.0171014
Chihuahuan Creosotebush Desert Scrub	51	92472	0	0.864791	0.135209	0	0	0.715283	0.284259	0.000457437	0.000261377	0.968057	0.0316816	0	1.60049e-05	0.674625	0.320599	0.00475994	0	0.717716	0.275849	0.00643472	0	0	0.065124	0.934876	6.81289e-06	0.00627381	0.181472	0.812248				1	0				0.821007	0.150733	0.0271818	0.00107773	0.812651	0.150757	0.0318958	0.00469603	0.955574	0.0319481	0.0108475
Sonora-Mojave Creosotebush-White Bursage Desert Scrub	52	91703	0	0.262427	0.737524	5.87842e-06	0	0.142433	0.841845	0.015679	0	0.369081	0.630876	0	0	0.228029	0.72139	0.050538	0	0.349495	0.613855	0.0366497	0	0	0.0311555	0.968844	0	0.000839949	0.104598	0.894562				1	0				0.554707	0.335724	0.0962399	0.0133289	0.59491	0.21925	0.109916	0.0759242	0.736237	0.0884949	0.174685
Chihuahuan Mixed Desert and Thornscrub	53	21071	0	0.889784	0.107153	0	0	0.422814	0.574123	0	0.000321298	0.741103	0.255513	0	0	0.139545	0.758324	0.0990684	0.000192209	0.884314	0.114777	0.000716632	0	0.00180439	0.998196	0	1.70853e-05	0.00178731	0.198324	0.799871		1			0				0.768345	0.203287	0.0262287	0.00213993	0.75866	0.198841	0.0315636	0.010935	0.968016	0.020807	0.00825075
[truncated: 9 more columns]
